# Supplementary material for: Massive and Widespread Organelle Genomic Expansion in the Green Algal Genus Dunaliella
Source: PubMed Central journal article supplement — Genome Biol Evol. 2015 Feb 6;7(3):656–63. doi: 10.1093/gbe/evv027 (PMC5322560; doi:10.1093/gbe/evv027), 2015-02-06
Supplement: supp_evv027_Supplementary_Materials_R1.pdf [file supp_evv027_Supplementary_Materials_R1.pdf]

## Supplementary Materials for:

### Massive and widespread organelle genomic expansion in the green algal genus *Dunaliella*

Michael Del Vasto<sup>1</sup>, Francisco Figueroa-Martinez<sup>2</sup>, Jonathan Featherston<sup>3,4</sup>, Mariela A. Gonzalez<sup>5</sup>,  
Adrian Reyes-Prieto<sup>2</sup>, Pierre M. Durand<sup>3,6</sup>, David Roy Smith<sup>1,Φ</sup>

<sup>1</sup>Department of Biology, University of Western Ontario, London, ON, N6A 5B7, Canada.

<sup>2</sup>Department of Biology, Canadian Institute for Advanced Research, Integrated Microbial Biodiversity Program, University of New Brunswick, Fredericton, NB, E3B 5A3, Canada.

<sup>3</sup>Department of Molecular Medicine and Sydney Brenner Institute for Molecular Biosciences, University of the Witwatersrand, Johannesburg 2193, South Africa.

<sup>4</sup>Agricultural Research Council, Biotechnology Platform, Pretoria 0040, South Africa.

<sup>5</sup>Departamento de Botánica, Facultad de Ciencias Naturales y Oceanográficas. Universidad de Concepción, Casilla 160-C, Concepción, Chile.

<sup>6</sup>Department of Biodiversity and Conservation Biology, Faculty of Natural Sciences, University of the Western Cape, Private Bag X17, Belville, Cape Town, 7530, South Africa.

<sup>Φ</sup>Corresponding author: David Roy Smith, Department of Biology, University of Western Ontario, London, Ontario, N6A 5B7, Canada. Email: dsmit242@uwo.ca. Tel: (519) 661 2111, ext.86482.

#### Table of Contents

|                                                                                                                                            |    |
|--------------------------------------------------------------------------------------------------------------------------------------------|----|
| <b>Supplementary Table S1.</b> <i>Dunaliella salina</i> nucleotide substitution rates for individual protein-coding loci.....              | 2  |
| Part A. Mitochondrial DNA-located genes .....                                                                                              | 2  |
| Part B. Plastid DNA-located genes .....                                                                                                    | 2  |
| Part C. <i>Dunaliella salina</i> CONC-001 protein-coding ptDNA genes. ....                                                                 | 3  |
| <b>Supplementary Table S2.</b> Synonymous substitution rates in plastid and mitochondrial genomes of various plastid-bearing lineages..... | 11 |
| <b>Supplementary Figure S1.</b> Maximum-likelihood protein phylogeny of chlamydomonadalean algae.....                                      | 12 |
| <b>References</b> .....                                                                                                                    | 13 |

**Supplementary Table S1.** *Dunaliella salina* nucleotide substitution rates for individual protein-coding loci.

**Part A. Mitochondrial DNA-located genes**

| MtDNA locus               | # codons | $d_N / d_S$ | $d_N$  | $d_S$  |
|---------------------------|----------|-------------|--------|--------|
| <i>cob</i>                | 389      | 0.0445      | 0.0319 | 0.716  |
| <i>cox1</i>               | 509      | 0.0311      | 0.027  | 0.8686 |
| <i>nad1</i>               | 295      | 0.008       | 0.0179 | 2.2332 |
| <i>nad2</i>               | 434      | 0.0436      | 0.0439 | 1.0067 |
| <i>nad4</i>               | 482      | 0.0505      | 0.0704 | 1.3961 |
| <i>nad5</i>               | 557      | 0.0444      | 0.0415 | 0.9355 |
| <i>nad6</i>               | 156      | 0.0707      | 0.0703 | 0.9939 |
| <b>Average</b>            | 403.14   | 0.042       | 0.043  | 1.164  |
| <b>Standard deviation</b> | 138.46   | 0.019       | 0.020  | 0.515  |

**Part B. Plastid DNA-located genes**

| PtDNA locus | # codons | $d_N / d_S$ | $d_N$  | $d_S$  |
|-------------|----------|-------------|--------|--------|
| <i>atpA</i> | 503      | 0.001       | 0      | 0.0139 |
| <i>atpB</i> | 479      | 0.0447      | 0.0113 | 0.2531 |
| <i>atpE</i> | 134      | ---         | 0.0029 | 0      |
| <i>atpF</i> | 173      | 0.001       | 0      | 0.0166 |
| <i>atpH</i> | 81       | 0.001       | 0.0001 | 0.085  |
| <i>atpI</i> | 238      | 0.0255      | 0.0143 | 0.5616 |
| <i>ccsA</i> | 396      | 0.1162      | 0.0042 | 0.0362 |
| <i>cemA</i> | 593      | 0.2312      | 0.0054 | 0.0234 |
| <i>chlL</i> | 290      | 0.025       | 0.0568 | 2.2727 |
| <i>petA</i> | 287      | 0.0617      | 0.0027 | 0.0444 |
| <i>petB</i> | 214      | 0.001       | 0      | 0.0424 |
| <i>petD</i> | 159      | 0.001       | 0      | 0.024  |
| <i>petG</i> | 36       | 0.001       | 0      | 0      |
| <i>petL</i> | 31       | 0.001       | 0      | 0.0404 |
| <i>psaA</i> | 711      | 0.0121      | 0.0006 | 0.0472 |
| <i>psaB</i> | 734      | 0.0436      | 0.0006 | 0.013  |
| <i>psaC</i> | 80       | 0.001       | 0      | 0.0349 |
| <i>psaJ</i> | 40       | 0.4914      | 0      | 0      |
| <i>psbA</i> | 352      | 0.0331      | 0.0038 | 0.1157 |
| <i>psbB</i> | 507      | 0.001       | 0      | 0.0083 |
| <i>psbC</i> | 461      | 0.0213      | 0.0018 | 0.0848 |
| <i>psbD</i> | 351      | 0.001       | 0      | 0.0276 |
| <i>psbE</i> | 81       | 0.001       | 0      | 0.0356 |

|                           |         |        |        |        |
|---------------------------|---------|--------|--------|--------|
| <i>psbF</i>               | 43      | 0.001  | 0      | 0.0408 |
| <i>psbH</i>               | 82      | 0.001  | 0      | 0      |
| <i>psbI</i>               | 36      | 0.001  | 0      | 0      |
| <i>psbJ</i>               | 41      | 0.001  | 0.0002 | 0.1716 |
| <i>psbK</i>               | 45      | 0.0507 | 0      | 0      |
| <i>psbL</i>               | 37      | 0.9961 | 0.1247 | 0.1251 |
| <i>psbM</i>               | 36      | 0.001  | 0      | 0      |
| <i>psbN</i>               | 43      | 0.4303 | 0      | 0      |
| <i>psbT</i>               | 30      | ---    | 0.0138 | 0      |
| <i>psbZ</i>               | 61      | ---    | 0      | 0      |
| <i>rpl2</i>               | 274     | 0.053  | 0.0014 | 0.027  |
| <i>rpl5</i>               | 180     | 0.001  | 0      | 0.0123 |
| <i>rpl14</i>              | 118     | 0.001  | 0      | 0.0441 |
| <i>rpl16</i>              | 136     | 0.41   | 0      | 0      |
| <i>rpl20</i>              | 111     | 0.0627 | 0.0035 | 0.056  |
| <i>rpl23</i>              | 115     | 0.0726 | 0.0034 | 0.047  |
| <i>rpl36</i>              | 36      | 0.0943 | 0      | 0      |
| <i>rps4</i>               | 251     | ---    | 0.0015 | 0      |
| <i>rps8</i>               | 143     | 0.3676 | 0      | 0      |
| <i>rps9</i>               | 195     | 0.001  | 0      | 0.0159 |
| <i>rps11</i>              | 129     | 0.1006 | 0      | 0      |
| <i>rps12</i>              | 128     | 0.001  | 0      | 0.0427 |
| <i>rps18</i>              | 139     | 0.001  | 0      | 0      |
| <i>rps19</i>              | 91      | 0.0351 | 0.0045 | 0.1284 |
| <i>tufA</i>               | 417     | 0.001  | 0      | 0.013  |
| <i>ycf3</i>               | 170     | 0.001  | 0      | 0.0178 |
| <i>ycf4</i>               | 219     | 0.144  | 0.0038 | 0.0266 |
| <i>ycf12</i>              | 32      | 0.001  | 0.0001 | 0.0551 |
| <b>Average</b>            | 201.353 | 7.842  | 0.005  | 0.090  |
| <b>Standard deviation</b> | 182.918 | 26.859 | 0.019  | 0.324  |

### Part C. *Dunaliella salina* CONC-001 protein-coding ptDNA genes.

#### Locus

*atpA*

#### Sequence

ATGGCAATGCGCACACCAGAAGAATTAAGTAATCTAATTAAGATTTAATTGAAGAATATACACCAGAAGTAA  
AAATGGTGGATTTTGGTATTGTTTTCCAAGTTGGAGATGGTATTGCTCGTATCTATGGATTAGAACGAGTAATGT  
CTGGTGAATTATTAGAATTTGAAGATGGTACATTAGGTATTGCTCTAAACCTAGAAGCAAATAATGTTGGTGGT  
GTATTATTAGGTGATGGTTTAAAAATTACAGAAGGTAGTCGTGTACGTTGTACAGGTCGTATTGCTGAAATTCC  
AGTTGGTGAAGCTTATTAGGACGTGTAGTTAACTCATTAGCACAAACCAGTAGATGGTAAAGGACCTATTAACA  
CAACTGATTCACGAGCAATTGAAGCAGCTGCTCCAGGTATTGTTTCACGTCGTTACAGTATATGAACCATTACAA  
ACAGGATTAGTTTCTGTAGATTCAATGATTCCAGTAGGACGTGGTCAACGTGAGCTTATTATTGGTGACCGTCA  
AACAGGTAACAGCAATTGGTGTGATACTATTCTAAACCAAAAAAGGTAAGGTGTTATTTGTGTTTATGTAG  
CAATTGGACAAAAAGCTTCATCAGTTGCACAAGTATTAACCTACATTAATAAGAGCGTGGTCTTTAGACTATACA  
ATTATAGTAATGTCAACTGCTAACGAACCAGCTACTTTACAATATTTAGCTCCTTACACTGGTGCTACTTTAGCA  
GAATATTTTCATGTACACGGGTCGTCCAACCTTTATGTGTTTACGATGATTTATCAAAACAAGCAGCAGCCTACCGT

GAAATGTCTTTATTATTACGTCGTCCACCAGGTCGTGAAGCTTACCCAGGTGACGTTTTCTATCTTCACTCTCGT  
 CTTTTAGAACGTGCTGCTAAATTAATACAGCATTAGGTGAAGGTAGTATGACAGCATTACCTATTGTTGAAAC  
 ACAAGAAGGAGACGTATCAGCTTATATTCCAACAAACGTTATTTCTATTACTGATGGTCAAATCTTCTTATCTTC  
 TGGTTTTATTTAACTCTGGATTACGTCCAGCTATTAACGTAGGTATTTCTGTATCACGTGTAGGTTTCATCAGCTCA  
 ATTTAAAGCAATGAAACAAGTAGCAGGTTCTTTAAAAATAGCGTTAGCACAATTCGGTGAATTAGAAGCTTTCT  
 CACAATTTGCTTCTGATTTAGATCAAGCTACACAAAACCAATTAGCTCGTGGTTACCGTCTTTCGTGAAATTTTAA  
 AACAAACCACAAAGTTCACCTTATTCATTATCTGAAATGGTTATTAGTATCTATACTGGTACAAAAGGTTACTTAG  
 ATACTTTACCAGTTGAAAAAGTAACATCATTCTAACAGGTCTTCGTAACCTATATTGCTTCAAATCATAAACAAT  
 TCGAAACAATTATTAATGATACAAAAGTATTTACTCCTGAAGCTGAAGGTATTTTACAAAAGCTATTCCAGAA  
 TATCTTACAGAAATTAAGCAAGTTAA

*atpB*

ATGACTAATGAAACAGCAAATATTGGACGTGTAGTTCAAGTTATCGGGCCAGTACTTGATATCGTTTTTGCAA  
 AGGTCAAGTACCTAACATTTACAATGCTTTAACTATTAAGAAGTAAAAATGCCGACGGGTTAGAATTAGCTGTAA  
 CTGTTGAAGTTCAACAATTATTAGGTGATAATGCTGTTTCGTGCAGTATCAATGTTACCTACAGAAGGTTAATGC  
 GTGGTATGGAGGTACTTGATACACAAAAACCATTAAGTGTCCAGTTGGTCTGATACGTTAGGTCGTATCTTTA  
 ACGTATTAGGTGAGCCGGTTGACAATTTAGGTCCTGTAATGCTGGTCAATCAAATCCAATTCACCGTCAAGCT  
 CCTACTTTTCGTAGACTTAGATACTCGTTTATCTATTTTTGAAACAGGTATTAAGTAGTTGACCTTTTAGCACCT  
 ACCGTCGTGGGGTAAAATTGGTTTTATTGGTGGTGTGGTGTAGGTAAAACAGTACTAATTATGGAACCTTATT  
 AACAACTTGTCAAAGCACACGGTGGTGTATCCGTTTTCGCTGGTGTAGGTGAAAGAACACGTGAAGGTAATG  
 ACCTTTATGGTGAATGAAAGAATCTGGTGAATTTCAAGAAAATAACTACCAGAATCTAAAGTAGCCTTAGTT  
 TACGGTCAAATGAATGAACCACCTGGAGCAGTATGCGAGTAGGTTAACAGCTTTAACAAATGGCAGAATATT  
 CCGTGACGTAACAACAAGACGTTTTATTCTTCAATGATAACATTTTCCGTTTTGTCAAGCTGGTGTGAAGT  
 TTCTGCCTTATTAGGTCGTATGCCATCAGCGGTAGGTTACCAACCTACTCTTGCTACAGAAATGGGTACATTACA  
 AGAACGTATTACAAGTACAAAAGATGGTAGTATTACTAGTATTCAAGCTGTTTATGTACCTGCTGATGACTTAA  
 CAGATCCTGCTAGTGCTACAACCTTCACTACTTAGATGCTTGTACTGTACTTTCAGGAGGTTAGCATCAAAG  
 GTATCTATCCAGCAGTAGATCCTTTAGATTCTACATCAACAATGTTACAACCATGGATCGTAGGGGAGAAACAT  
 TATTCAGCAGCTTCGAATGTTAAAGAAACATTACAACGTTATAAAGAGCTTACTGACATTATCGCGATTTTAGG  
 CCTAGATGAATTAAGTGAAGAAGATCGTCAAACAGTTGCTCGTGCACGTCGTATTGAACGATTCTTATCTCAAC  
 CTTTCTTCGTAGCAGAAAGTTTCACTGGAGCACCAGGTAATACGTAACCTTTATCAGAATCTATCGATGATTTCA  
 ACCGCATTATCAGCGGTGAACCTTGATAATTTACCTGAAGCAGCTTTCTATTTAGTTGGTAAACATGAACGATGTTT  
 TAGCCAAAGCAGAAACACTTCAAGGCTAA

*atpE*

ATGAATTTACAAATTTCAATCTAACACCAGAACGTCCTTTTTGGAATGGTCAAGCTGACGAAATGTTTTACCA  
 ACTGAAACAGGTGAGATGGGTGTTTTAAAAAATCATGCTCCTATTATTACTGGTTTAGATGTAGGTGCAATGCTT  
 ATTCGTACAAATCAAGAATGGACTTCTTTAGCGATTATGGGTGGTTTTGCATTAGTTAAACAAAATGTTGTAAC  
 ATCTTAGCAAATGAAGCACAATCTTCTGAAAACATTGACTCCTGAAGAAGCAAAAAATGATTTTGAACAGCAA  
 AAAATAATGAAAAAGCTGAAGGGTTAAAGATAAAGTAGAAGCTAATTCGCTTTTAAACGTTCTAAAGC  
 ACGTTTTCAAGTAGCAGTAAAATCAAAAAACTTTTTAA

*atpF*

ATGCTTCTTTAGGTCATGGTGGTTTTGGAATTAATACAAATATTTTTGAACTAATCTTATAAAATTTAGCTGCT  
 GTTATTGGAATTGTTGTTTCATTTGTAGGTAATAATTTAAATGCTTTATTAGAAGATCGTAGAAAAACAATTCCT  
 TCTAATTTAGAAGAAGCTAATCAAAGAGCAATTGAAGCACAAGAAAAATTACAAAATGCCAAAACCTCAGTTAG  
 AATTATCTAAGAAAAAAGCACAAGAAATCCGTGACGAAGGTGTCTCTCGTGCAAGTAATGAAATTCAAACAGT  
 AGTAAGTCAACATGAAATTCGATTAGCTAGTTTAGAAGATTTAAAAATGAAACAGTTCAATTTTATCAACAAA  
 AAGCATTCAAAGAAGCTTATGTTTATGTAGTATCTCGTATTATGAGTGTGACGTGACGTGACGTGACGTTAA  
 TAGATTCTACATATCATGTTATTGTTAAACAATTTCTATGTTTTCAAAATTTACAGAATTTAAACCAAAATCTATCTC  
 TTAA

*atpH*

ATGAACCCTATTGTTGCTGCTGCTTCTGTTGTGTCTGCTGGTTTTAGCTGTTGGTTTTAGCTGCTATTGGTCTGGTA  
 TGGGTCAAAGGTACAGCTGCAGGTTATGCTGTTGAAGGTATTGCACGTCAACCTGAAGCTGAAGGTAAAATCCGT  
 GGTGCTTTATTATTAAGTTTCGCGTTTATGGAATCTTTAACTATTTATGGTCTAGTTGTAGCTCTTGCTCTCTTTT  
 CGCTAACCCTTTTGCTGGTTAA

*atpI*

ATGATTAATCCTTTATTAGAAATTGCTGAAGTTTCGGTAGGACAACATTATTATTGGAATTAGGAAATTTTGAA  
 TTACATGGTCAAGTTTTAATTACTACTTGGGTAGTAATTGCTATTCTTCTAGCTTTATCTTTATTAGGTAACAGTA  
 ATTTAAAACCAACTCCAGACGGTTTACAAAATTTTACTGAATATATTACTGAATATATTCGTGATTTAGCAAAA  
 ACACAAATTTGGTGAAGAAGATTATGTAATAATGGGTTCCTTTTATTGGTACATTATTCTTATTTATCTTTGTGTCTA  
 ACTGGTCTGGTGCATTATTTCTTATCATATTATTGAAATTCCTAATGGTGAACCTGCTGCTCCTACGAATGACA  
 TTAATACTACGGTAGCTTTAGCTTTATTAACATCAATTTTCATATTTCTATGCGGGTATTTCTAAAAAAGGACTTG  
 GCTATTTCAAACGTTATATTTACCTGCAGCATTTTTATTACCAATTAACGTAAGTACTAGAGGATTTTCAGTAAACCCG  
 TTTCAATTAAGCTTTTCGCTTTTTGGAATATCTTGGCCGATAAGCTAGTTGTGCGAGTTCTAGTATCTCTGTACC  
 CCTAGTTATTTCAATCCCTGTTATGCTTCTTGGAGTTTTACAAAGTGTGTACAAGCTCTTGATTTGCGACTTTA  
 GCTGGAGCCTACATTTGGCGAAAGCTTAGAAGATCACCACTAA

*ccsA*

ATGAATGCGCAACTTGCAAATCTTTCTTTTTAGTTTTATTATGTTTCGATGATTTGTTATTGGATTGGGCCTTTAA  
 GTCGTGACCTATTTGGAATTTCTTCAAACCTATCGCCGCTCGGCGATCCGAGCGGACGAGACTTTAAAG  
 TCCGCTCGTAGTACGGTAATTTCTACTGGACTAAATCAATCTGTAATACCGTCTGAATTAGTAGTAGACGGGCTT  
 GGTACAAAAGTAGTAATAATTCCTCTTTGTTTTCTTCAGAAACAAACGTTTCTACCTTACAAACAAATGCTGGT

TTTTTAGGAGGAGTACTAAATAATATTAGATCACAAATTGGATATATAAAAACCTTCTTTTAATATTAGCAATAGT  
 TTACAACATAATTGGACGTTTCAGGAATTATCTTATCAAATGTTTTATTAATGGTTTTATTGTGTAACCGTTGGAAA  
 GAATCTGGACATTTTCCATTAAGTAATCTATATGAATCTTTAATGTCTTATCTTGGAGTTTTACTGTTATTCATT  
 TATTTCTTGAAAACCTTACTAACTCACAAACAGCATCAAACCAAAGTGTAGGTAATTTATAGGTGCTATAACT  
 ACACCTAGTGTCTTATTACAAAATGCTTTTGTACATTCACCTTACCTAAAAGAAATGCAAGGTTCTTCATCGTA  
 GTACCTGCTTTACAATCTAATTGGTTAATGATGCATGTTACAGTAATGATTATAAGTTATGCAGCTTTAATTTTA  
 GGTTCACTACTATCTATTGCTTACTTAATTATTACCATAAAAACGTGAATCAAATTTTGATACAAAATTTAGATTCA  
 AATAATATAACAAATAAGGACACAGAAGAACTAATTCTGAATTCGTTAGTGCTAAAGGTACTTGTATTTC  
 TAATAAAAAAATCTGCGTCAGTCTATAGCTTTAACCTTAGACAACCTTAAGTTATAGAATTTTAGGTATAGGTTT  
 CCCTTTCTTAACTATTGGAATTTTGTCTGGTGTGTATGGGCTAACGAAGCATGGGGCTCTTATTGGAGTTGGGA  
 TCCCAAAGAACTTGGGCTTTTTAACGTGGTTAGTTACGCAATTTATTACATACTCGACTAAATAAAGGTTG  
 GGAAGGTCAAACCAGCTATTATTGCCTCTTTAGGTTTTATTGTTACTTGGATTTGCTATTTAGGAGTAAACTT  
 AATAGCGAAAGGTTACATAGTATGGTTGGATTATAATAA

*cemA*

ATGATACAAAAAACAACCTTTTTATCGTTTTTAAATCTAATTCGGACCCGCTAAAAATTTTTTATCATT  
 TCTAAAGATAATGAACTACAAGCGGGCCCGCAAATTAGGTTTAAACAATGATTATGATAAAAAATCAAAAA  
 GATTTTCACGTTTGACGTCTGTAAAGGCGGCACCTAAACAAGAAGTAGTTTCGATTACTTATGAAGAAATAGGA  
 TTATTTCTCGTTCATTTAGTCGTGTTTTAGATCGATTTTTAAACAAATTTTTTCAGATGTAGAAAATTTAGTAA  
 TACAAGAATATAGATTCTATCGTTATTTATTTTTAAACAACCTTAAAAATGCTTTTTAATTTTTTTTTGTTCTTTT  
 CTCGTGAATTTTTAGCAAAATCTTATGTTGTACGACCAATTAATGAAATTTTTTGGAAATCAAAAACAACTGAA  
 ATTTTTTAAATTCATATCAACAAAAACATGCATTTGCCGAATTAAGATTTTGAAGAAAATTAATTTTTGAG  
 TCATTAATTTATCCAAAATCGCTTAGTCAGCCGTAATTTGGAGAAGAAAATAAGTCTCTTCTTATCAATTTACA  
 CCTATAAGAAATACGATGTCACCGCCTATTAAGAAAATCAAACAACAAAAGAAAATTTACTTATTAACAAAA  
 TTAACGAAGTTAATTTGTAAAGTAAATTTCTAAAAATTTGGGTGGGTTCAACTTCAGATTTTGTAAATTTTTATCA  
 ATTTCCAAAACCTATCGAATTTCAAAGCCATTACTTATGCCTTTTTATAGCAAAAAGTAAATAACGTTTCGTTT  
 CGAGCTCGGACGAGCTCCACATGATAATTTATCTACAGTAAATCAACATGGTAAAATCGGTTATATTGATCATT  
 CTCTTCATCTGTAAAGTTAATATTTAAAAAACAACAAATGAAAGCGAAGCAAAAAGAGAAGATTTACCTCA  
 GAAATATCAAAATCTTCTCATTTTTCTATTCTTAATGAAAATATTTGAACTCTCCTCCCTCGGCTCGTTCCGAG  
 GCCGAATCGACCCCGCCACAAAAATAAAGATTTTTTGCCATCCGGTAATAGGACAGACAGACTCAATATT  
 GTTATCGAATAATGAAAATATTCTTCAAAGAGGTAATATTTCTTATTCAAACGATATGCAAAATCTCAAGTAAAA  
 AAGAGGCTGAAGCTGCCCTCACGGATGGACTTCGCACATCAATAAATCCAAAATCGGTTCTTTTTGAAACTTTA  
 AATATTTCAAAGAGTTGGAACCAAAAAACAACCTCACCAACTTCAAACACTCATTTTTTAGTTTATCAAATAT  
 TGAAGCTGACAAAAATATCCAACAACGTTATCAAGAAAAACTATAGAATTAGCACAAACGTTATAACGATCAA  
 AGTGTGAAAGCAATTACAAATTTTTTTGGTGTATGGTTTCATTAGTAACCTTATTTATTTATTGTATGTTCTTG  
 AAATCAAATTAATAACTCAATCTTTTTATTAGAAGTCTTTTTGGTTTAGATGATAGTAAAAAATCTTTGTT  
 GATCTTTTAGTTACAGATTTATTAGTAGGGTATCACTTTTCAAACCTTATGGAACTATTTTTGAGTTGTTT  
 AACCATTAGGTTTACCAGAAAGTCAAACCTGGTATTTTTTTATTGGTAGCAACCTTACCTGTTTTATTAGACGTTT  
 TATTCAAATATTTAATTTCCGTCATTTAAATCGTTCATCACCAGCTACAGTTGCTACTTATCATGCTATTATTGA  
 ATAA

*chlL*

ATGAAATTAGCTGTTTATGGTAAAGGTGGTATAGGAAAAACAACAGCAAGTTGTAATATTTCAATTGCATTAGC  
 AAAACGTGGAAAAAAGTATTACAAATTTGGTTGTATCCTAAACATGATTCAACATTTACATTAACAGGATTTT  
 TAATCTCATAATTATTGATACTTTACAAAGTAAAGATTAATCATTACGAAGATGTTGGCCAGAAGATGTAATTT  
 ACCAAGGATATGGTAACGTAGACTGTGTAGAAGTCTGGTGACCACCTGCAGGTGCTGGTTGGCGATTATGTA  
 GTAGGAGAAACAGTAAAACTATTAAGAATTAATGCTTTCTTTGAATATGATATTATTCTGTTTGTATGTTTAA  
 GGGGATGTTGTTTGGTGGTTTTGCAGCACCCTAAATTAACGATTATTGTATTATCGTTACTGATAACGGG  
 TTCGATTCAGTGTGCTGCAACAGAATTGCTACGTCGGTAAGAGAAAAAGCACGAGTTCACCCATTACGTCT  
 GGCAGGTCTTATTGGTAATCGTACATCTAAACGAGACCTTATAGATAAGTATGTTGAAGCTTGCCCTATGCCTGT  
 TTTAGAGGTTTTACCTTTAATTGAAGATATTAGAATTTCAAGAGTAAAAGGTAAAACCTTATTTGAAATGGCTG  
 AAGGAGAGCCTTCACTTTTATACATATTAGACTTTTACTTAAACATAGCTGACCAATTAATCTGAACCAGAA  
 GGGTTGTTCTCGTGAATTAGGGGATCGTGCCTTATTTACTACTACTATCAGACTTTTATCTTCTCTTCAACAT  
 CTAATACGTGATACTACTAATAACAAATCTGAAAGTAATGATTTAGATTTCTTTCTGGTTTTAA

*petA*

GCTTATCCGATTTTTGCACAACAAGGTTATGAAAACCCACGTGAAGCTACAGGTCGTATTGTTTGTGCTAACTGT  
 CACTTAGCACAAAAACCTTCAGAAATTGAAGTACCTCAAGCAGTTTTACCTGATACAGTATTTGAAGCTGCTGT  
 TCAAATCCATATGACAAATCAGTTAAACAAGTAAATGCTAAAGGTAAAAAGCTGATTTAAACGTAGGTTTTG  
 TTTAATTTCTCCAGAAGGATTTGAATTAGCACCAGCTGATCGTATCCCAGAAGAAAATGAAGAAAAAAGTAGGA  
 AACGTTTATTACCAACCTTATAGTCTTGACAAAAAATATTCTTGTAGTTGGTCTTTACCAGGAAAAACATAT  
 AGTGATTTAACTGTACCTATCTTTCTCTGATCCAGCAAAAAAATAAATGTTTTCATATTTAAATACCCTATC  
 TATTTAGGTGCTAACCGTGGACGTGGTCAACTTTATCCAGATGGTTCTAAATCAAACAACACTGTTTATAACACT  
 CCAGCTCCTGGTAAAATTTGTTTCTATTACAACCTGCTAATGAGAAAAAAGGTGGTTATTTAGTAAATATTGAAAA  
 AGCTAATGGTGAACAGTAACTGAAAAAATCTCCAGGACCTGAATTAATTGTTCAAGAAGGACAAGTATTA  
 ACAGCTGATCAGCCTTAACTACAAACCCTAACGTAGGTGGTTTTGGTCAAAAAGATGTAGAAGTTGTTCTTCA  
 AAACCCTGCAGTATTCAAGGATTATTAGTTTTCTTTGCTTTTTGATTATTAGCACAAAGTATTATTAGTTCTTAA  
 AAAAAACAATTCGAGAAAGTTCAACTAGCAGAGATGAACCTTAA

*petB* ATGAGTAAAATTTACGATTGGTTCGAAGAACGTTTAGAAAATTCAAGCAATTGCTGATGATATTACAAGTAAATA  
 TGTTCCGCCTCATGTAAACATTTTCTACTGTCTTGGTGGTATTACATTTACTTGTTCCTTAGTTCAAGTAGCTACT  
 GGTTTTGCAATGACTTTCTATTACCGACCAACTGTAGCAGAAGCTTTCGCTTCAGTACAGTATTTAATGACTGAT  
 GTAACTTTGGATGGTTAATTCGTTCAATTCACCGTTGGTCAGCTAGTATGATGGTTTTAATGATGATTTTACAC  
 GTTTTCCGTGTTTACTTAAACAGGTGGTTTCAAACGACCAAGAGAGCTGACATGGTTAAGTGGTGTATTATGGCC  
 GTTTGACTGTTTCATTCCGGTGAACAGGTTATTTACCTTGGGACCAAATCGGTTACTGGGCTGTTAAAATT  
 GTAACAGGTGTTCCCTGAAGCTATCCCTGTTATTGGTGGTCCCTTAGTAGAATTATTACGTGGTGGTGTAGGTGTT  
 GGTCATCAACATTAACACGTTTCTACAGTTTACACACATTTGTTTTACCATTATTAACAGCTGTTTTCATGTTAA  
 TGCCTTCTTAATGATTAGAAAACAAGGTATTTTCAGGTCCTCTATAA

*petD* ATGTCTGTAACAAAAAACAGATTTAAGTGATCCAGTATTAAGGCTAAAATTAGCGAAAGGAATGGGACATA  
 ACACATATGGTGAGCCAGCTTGGCCAAATGACTTACTTTACATGTTCCCTGTTGTAATTTTTGGTACATTTGCAT  
 GTGTTATTGGTTAGCTGTATTAGAACCAGGTTCTATTGGAGAACCCAAACCTTTGCTACACCTCTTGAAA  
 TTTTACCAGAATGGTATTTCTACCCAGTTTCCAAATTTACGTGTTGTACCTAACAAATTTAGGTGTTGTTT  
 AATGGCAGCTGTACCGGCTGGTTAATGACAGTACTTTTTATTGAAAATATTAATAAATTTCCAAAACCTTACC  
 GTCGTCCTATCGCTACTATTTTATTCTTAGTAGGTAAGTGTAGCAGCTGTTTGGTTAGGTATTGGTGCTACTTTCCC  
 TATCGATATTTCTTAACTTTTGGATTATTCTAA

*petG* ATGGTTGAACCTTATTATCAGGAATTGTATTAGGATTAGTCCAGTACTATCGCTGGATTATTTGTAACAGCA  
 TACTTACAATATCGTAGAGGTGATTTAGCTAGTTTCTAA

*petL* ATGGTAACTATTTCAAGTTATATTGTATTATTAATCGGTGCTTTAGGTTTACATTAACACTTTACTTAGGTTTTT  
 TAAAAGGAATCAAGCTTATTTAA

*psaA* AAACCTGGACATTTTTCTCGTGCATTAGCAAAAGGTCCTAATACAACACTTGGATTGGAAATCTTCATGCTGAT  
 GCTCACGACTTTGACAACCATACTTCAGATTTAGAAGAAATCTCAAGAAAAGTATTTAGTGCTCATTTCGGGCA  
 ATTAGGTATTATTTAATTTGGTTAAGTGGGATGTATTTCCATGGTGTCTGTTTTTCAAACCTATGAAGTTGGTTA  
 TCTGATCCAACACATATTAACCTAGTGCACAAGTAGTATGGCCAATTGTTGGTCAAGAAATTTAAACGGTGA  
 CGTAGGTGGTGGATTCCAAGGTATTCAAATTACTTCTGGTTTCTCCAACCTATGGCGAGCTAGTGGTATCACTAG  
 TGAATTACAATTATATCAACTGCTATTGGTGGTTAGTGTAGCAGCAGCTTGTTCCTTTGCTGGTTGGTCCAC  
 TACCATAAAGCAGCACCAAAATTAGAATGGTTCCAAAATGTGAATCTATGTAAACCACCACCTAGCTGGTTTT  
 ATTAGTTTACGTAGTTAGCTTGGGCAGGTCATGAAATTCATGTATCATTACCAGTTAATAAATTTAGTAGTC  
 TGGGGTTGATCCTAAGGAAATACCATTACCTCATGAATTTTTATTAATCAATCTATTATTGCTGATTTATACCC  
 AAGTTTCTCAAAGGATTAGCACCATTCTTACATTAATTTGGGCTGAATATAGTGATTTCTTAAACATTTAAAGG  
 TGGTTTAAACCTGTAAACAGGTGGTTTATGGTTATCTGATACTGCTACCACCCTTAGCTATTGCTGTATTATT  
 CTTAGTAGCTGGTACCAATACCGTACAACTGGGGTATTGGACACAGTATTAAGATATTTTAGAATCACACA  
 AAGTCCATTTACTGGTAATGGTCAATGCTGGTTTATATGAAATTTAACTACTTCTTGGCATGCTCAATTAGCTA  
 TTAACCTAGCTTTATTTGGTTCCGTTTCTATTATTGTAGCTCACCACATGTATGCAATGCCTCCTTATCCTTACT  
 AGCAACAGACTCGGTACTCAACTTCTTTATTTACACACCATGTATGGATTGGTGGTTTCTGTGTTGTTGGTGC  
 AGGTGCACACGCAGCTATTTTCATGGTTCGTGACTATGATCCAACAAACAACCTACAACAACCTATTAGACCGTG  
 TAATTCGTCACCGTGATGCTATTATTTACACTTAACTGGGTATCTATTTTCTTAGGTTTCCACAGTTTCCGGATT  
 ATACATTCATAATGATACAATGAGTGCTTTAGGTGCTCCACAAGATATGTTCTCTGATACAGCAATTCATTAACA  
 ACCTGTTTTTGCACAATGGATCCAAAACACGCATTTTACAGCACCTCAACTAACAGCTCCTAATGCGTTAGCTGC  
 TACAAGTTAACTTGGGGTGGTGTAGTGTGACGTTGGTGGTAAAGTAGCGATGATGCCTATCGCTTAGGTA  
 CATCTGACTTCTTTGTTCAACCACCTCCAGCTTTTCAAACTCAGTAACTGTTTTTATTAAAAGGTGTTTT  
 ATTTGCTCGTATCTCGTTAATTTCTGATAAAGCTCAATTAGTTTCCGTTTCCCTTTGATGGACAGGACG  
 TGGTGGTACATGTCAGGTTTTCAGCTTGGGACCACGTTTTCTTAGGTCTTTTCTGGATGTATAACTCATTATCAATT  
 GTTATTTTCCACTTTAGCTGGAAAATGCAATCTGATGTTTGGGGTACTGTAAGTATTCTGGTGTATCTCACATT  
 ACTGGTGGTAACTTCGCTCAAAGTGCTAACACAATTAATGGTTGGTTACGTGATTTCTTTGGGCACAATCATCT  
 CAAGTTATCCAATCATACGGTTCAGCACTATCAGCTTACGGTCTTATGTTCTTAGGTGCTCACTTCGTATGGGCT  
 TTTTCATTAATGTTCTATTCTCTGGTCTGGTTACTGGCAAGAGTTAATCGAGTCAATTTGATGGGCTCACAA  
 AAATTACGTGTAGCACCATCAATTCACCACGAGCTCTTAGTATTACACAAGGTCGTGCTGTTGGTGTAGCTCA  
 CTACCTTTTAGTGGTATCGCTACTACATGGTCTGTTCTTAGCAAGAATTATTGCTGAGGTTAA

*psaB* ATGGCAACAAAGCTGTTTCCGAAATTTAGCCAAGGCTAGCACAAGATCCAAGTACTCGTCTGATTTGGTATGG  
 ACTTGCTACAGCACATGATTTTGAAGTCAATGATGGTATGACTGAAGAAAATCTTTATCAAAAAGATTTTGGCTTC  
 TCATTTTGGTCAATTAGCAATTTTCTCTATGGACATCTGGAAAATTTATTCATGTGGCTTGGCAAGGTAATTTT  
 GAACAATGGGTAAGTATCCTATTTCATGTACGTCCTATTGCTCATGCTATTTGGGATCCACACTTTGGTCAACCA  
 GCTGTTGAAGCATTACACGTTGGTGGTGCCTGCTGGTCCAGTAAATATTGCTACATCTGGTGTATACCAATGGTG  
 GTATACAATTGGTTACGTTCTAACCAAGAATTATATGTTAGTTTCAAGTATTTTATAGCTTTAGTTTTCAGCAGTTTTT  
 TTATTTGCTGGTTGGCTACATTTACAACCTAATTTCAACCATATTATCATGGTTAAAGATGCTGAATCAGT  
 TTAACACCATTAGCTGGTTTATTTGGTGAAGTCTTTAGCATGGACAGGAAATTTAGTTTACAGTACTATT  
 CCAGAATCACGTGGACAACATGTAGGCTGGGACAACCTTCTATCAGTTTTTACCACACCCTCAAGGTTTAACTCC  
 GTTCTGGTCAAGTAACTGGGCTGCTTATGCACAAAACCCAGATACAGCTTCTCATGCTTTTGGTACTGCTGATGG  
 TTCAGGTAAGTCAATTTAACTTTTTTAGGTGGTTTCCATCCACAACTCAAAGTTTATGGTTATCTGATATGGCT  
 CATCACCATTAGCTATTGCAGTCTTTTTCATTGTTGCAGGTCACATGTACCGTACAACTTTGGTATTGGACAC  
 CGATTAGAAGCTATCTTAGAAGCTCATACACCGCTGCTGGTGGTTTAGGAGCTGGTCATAAAGGATTATTTCA

CACAGTTAACAATTCTTTACATTTCCAATTAGGTTTAGCTTTAGCTTCAGTAGGTACGATTACATCATTAGTAGC  
 ACAACACATGTATTACATTACCACCTTACGCTTATTTAGCAGTTGATTTTACAACACAAGCGTCTCTTTACACACA  
 CCATCAATATATTGCTGGTTTTATCATGTGTGGTGCATTTGCTCATGGTGCTATTTTCTTTATTTCGTGATTATGAT  
 CCTGAACAAAACAAAGGTAACGTTTTAGCAGCTGTTTTAGATCATAAAGAAGCTATTTTACACACTTAAGTTG  
 GGTATCTTTATTCTTAGGTTCCATACTTTAGGTTTACGTTTCATAATGACGTAGTTCAAGCTTTCCGGTACACCA  
 GAAAAACAAATTTAATTGAACCAGTTTTTGCACAATGGATTCAAGCTGCTCAAGGTAAGTCATTATATGGATT  
 TGACTTATTATTAGCTTCTCCTTCTAGCCCAGCTTACTCAGCTGGTCAAAGCTTATGGCTTCCAGGTTGGTTAGA  
 AGCTATTAATAATAACCAAAACTCTTTATTCTTAAACAATTGGGCCAGGTGACTTCTTAGTACACCATGCTATTGC  
 TTTAGGTCTTCATACAACAACACTTATTTAGTTAAAGGTGCCTTAGACGCACGTGGTCTAAATTAATGCCAGA  
 TAAAAAAGATTTCCGGTACAGTTTCCCTTGTGACGGTCTGGTCTGGTGGTACTTGTGATATTTAGCTTATGA  
 TGCTTTCTATTTAGCTGTTTTCTGGATGCTAAACACTATTGGTTGGGTTACTTTCTATTGGCATTGGAAACATTTA  
 ACATTATGGCAAGGTAATGTATCACAATTCGATGAATCTTCTACTTATTTAATGGGTTGGTTAAGAGATTACTTA  
 TGGTTAAACTCACAACCTTATTAATGGTTACAACCCATTTGGTATGAACAGTCTTTCAGTTTGGGCATGGACT  
 TTCCTTTTTGGACACCTTGTATGCAACTGGTTTCATGTTCCCTATTTCTTGGCGTGGTACTGGCAAGAGTTAA  
 TTGAAACTCTGTTTGGGCTCACGAAAAACTCCATTAGCTAACTTAGTTTACTGGAAAGATAAACCCAGTAGCT  
 TTATCTATTGTTCAAGCTCGTTTAGTAGGTTTAGCTCACTTCTCAGTGGGTTATATCTTTACTTATGCTGCTTCTT  
 AATTGCATCTACTGCAGGACGTTTTGGTTAA

*psaC*

ATGGCTCATGTTGTAATAAATTTATGATACTTGTATTGGTTGTACACAATGTGTACGTGCTTGTCTTTAGACGTTT  
 TAGAAATGGTACCTTGGGATGGTTGTAAAGCGGCACAAATGGCTTCATCTCCTCGAACAGAGGACTGTGTTGGT  
 TGCAAACTTGTGAAACAGCATGCCAACTGATTTTTTAAAGTGTACGTGTTTATTTAGGTAATGAAAGCACAAAG  
 AAGTTTAGGTTTAGCTTATTA

*psaJ*

ATGAAAGATTTTACAACATATTTATCAACAGCTCCTGTTGTTGGTTTAGGCTGGGCTATTTTTACATCTGGTTTAT  
 TAATTGAAATTAATAGATTTTTCCAGATCCATTAGTTTTTCTTTTTAA

*psbA*

ATGACAGCAATTTTAGAACGTCGTGAAAATACTAGCCTTTGGGCACGTTTTTGTGAGTGGATCACTTCAACTGA  
 AAACCGTTTATACATCGGTTGGTTGGTGTATCATGATCCCAACATTATTAACCTGCGATCTCAGTATACATCAT  
 CGCATTATCGCAGCACCTCCAGTTGACATCGATGGTATCCGTGAACCAGTTTCTGGTTCATTATTATACGGTAA  
 CAACATCATCACTGGTGCAGTTGTTCCAACCTCAAACGCTATCGGTTTACATTTCTACCAATCTGGGAAGCTGC  
 TTCTTTAGATGAGTGGTTATACAACGGTGGTCCCTTACCAATTAGTTGTATGTCACCTTCTTCTTAGGTGATGTTGT  
 TACATGGGTCGTGAGTGGGAATTATCTTACCCTTAGGTATGCGTCCATGGATCGCTGTTGCTTACTCAGCTCCA  
 GTAGCTGCTGCAACTGCTGTATTCATCATCTACCCTATCGGTCAAGGTTCACTTCTGATGGTATGCCTTTAGGT  
 ATTTCAAGTACTTTAACTTCATGATCGTATTCCAAGCTGAGCATAACATCTTAATGCACCCATTCCACATGTTT  
 GGTTGTGCTGGTGTATTTGGTGGTTCATTATTCTCAGCAATGCACGGTTCATTAGTTACTTTCATCTTTAATCCGTG  
 AAACACTGAAAACGAATCAGCTAACGCTGGTTACAAATTCGGTCAAGAAGAAGAACTTACAACATCGTAGC  
 TGCTCACGGTACTTTGGTTCGTTAATCTTCCAATATGCCTCATTCAATAATTCTCGTTCATTACACTTCTTCTTA  
 GCTGTATGGCCAGTTGTATGATCTGGTTAAGCTTTAGGTTATTTCAACTATGGCATTGCACTTCAAGAACTGTTT  
 AACTTCAACCAATCAGTAGTTGATTCAAACGGTCTGTATTAACACTTGGGCTGACATTATCAACCGTGTCTAA  
 CTTAGGTATTGAAGTAATGCACGAACGTAACGCGCATAACTTCCCATTAGACTTAGCTTCAGTAGAAGCTCCTT  
 CAGTTAACGGTTAA

*psbB*

ATGGGATTACCGTGGTATCGTGTTCACACAGTAGTAATTAATGACCCAGGTCGACTAATTTCTGTGCATTTAATG  
 CACACAGCTCTAGTAGCTGGTTGGGCTGGTGTATGACATTTTGAATTTGCAGTTTTTGATCCATCAGATCCA  
 GTATTAACCCATATGTGGCGTCAAGGGATGTTCTGTTCTTCTTACACGTTTAGGTTGACACAATCATCGG  
 GGTGGTTGCAAAATTAGTGGTGAACATCTTCAAACCCAGTATGACACAAGTACATCTGAGGTTAAGGTCAGCTTCGCA  
 CATTGTTCTTTCAGGTTTATTATCTTGGTTCAGTTTGGCACTGGGTTTACTGGGATTTAGAATTATCCGTGAT  
 CCACGTACAGGTAACACTGCATTAGATTTACCAAAAATTTTTGGTATTATCTTTTCTTAGCAGGACTTCTTTGT  
 TTTGGTTTTGGTGTCTTCCACGTAACAGGTGTTTTTGGACCTGGTATTTGGGTATCAGATCCATATGGATTAACA  
 GGTAGGTACAACCAGTAGCTCCTTCTGGGGTGTGAAGGGTTTACCCTTACAACCCAGGTGGTGTACCAGC  
 TCACCATATTGCTGCTGGTATTTTAGGTGTATTAGCAGGTTTATTCCACCTTTGTGTTCTGTCATCAATTCGTTA  
 TATTTTGGTTTATCAATGGGTTCTATTGAATCAGTTTTATCAAGTAGTATTGCTGCCGATTTCTGGGACGTTTTCG  
 TAGTAGCAGGTACTATGTGGTATGGTTCTGCAGCAACTCCAATTGAATTTTGGTCCAACACGTTACCAACTTGG  
 GACCAAGGTTTCTTCCAACAAGAAATTCAAAAACGAGTAGCACAAAGTACATCTGAAGGTTTATCTTTTCAGA  
 AGCTTGGGCAAAAATTCCTGAAAAATTAGCTTTCTATGATTACATTGGTAATAACCCAGCTAAAGGTGGATTAT  
 TCCGTACAGGTGCTATGAACAGTGGTGTGGTATCGCAGTAGGTTGGTTAGGACACGCTAGTTTTAAAGATCAA  
 GAAGGTGCTGAACCTTTTGTTCGTGCTATGCCTACTTTCTTTGAAACTTCCCTGTTGTTTTAATTGATAAAGACG  
 GTGTTGTTCTGTGCTGACGTACCATTCCGTAAAGCTGAATCAAATACTCAATTGAACAAGTTGGTGTTCAGTTA  
 CATTCTATGGTGGTGAATTAATGGTTTAACTTTACTGATCCCTTAACTGTTAAAAAATATGCACGTAAAGCTC  
 AATTAGGTGAAACTCTTGAATTTGACCGTTCGACTTACAATTGACGGTGTATTCGGTAGTACGCCACGTTGGT  
 GGTTCACTTTCGGACACTTATCTTTGCCTTATTATCTTCTTGGTCATATTTGGTCATATTTGGTCAAGAACTATTTT  
 CGTGACGTTTTCTGCTGGTATTGATGAAGACATTAATGATCAATTAGAATTCGGTAAATATAAGAACTTGGTGA  
 TACTTCATCTGTTCTGTAAGCTTTCTAA

*psbC*

GTGGAAACACTTTTTAACGGAACATTAACCTGTAGGTGGTCTGTGACCAAGAACTACTGGTTTCGCATGGTGGGC  
 CGGAAATGCTCGTTTAAATCAACCTATCAGGTAACTATTAGGTGCACACGTTGCACACGCTGGTCTTATCGTTTT  
 CTGGGCTGGTGTATGAACCTTATTCGAAGTTTCTCACTTCGTTCCAGAAAAACCTATGTACGAACAAGGTTAAT

TCTTTTACCTCACATTGCTACTTTAGGTTATGGTGTAGGTCCAGGTGGTGAAGTACTTGATACTTTCCATACTTC  
GTATCAGGTGTTTTACACCTTATCTCTTCAGCTGTTTTAGGTTTTGGTGGTGTACCCTCTTTAATTGGACCTG  
AACTTTAGAAGAATCTTACCCATTCTTTGGTTATGTTTGGAAAAGATAAAAAACAAAATGACTAACATTTTAGGTT  
ACCCTTAATCATTTTAGGTTGTGGTGTCTGGCTTCTGTGTAAAAGCTTTATACTTTGGTGGTGTATGATAC  
TTGGGCGCCTGGCGGTGGTACGTTTCGTATCATTCAAACCCTACAACCTAACGCTGCTATCATCTTTGGTTACAT  
CGTTAAGTCACCTTTCGGTGGTATGTTGGATTGTTAGTGTGGATAACTTAGAAGACATTATTGGCGGTACAT  
TTGGATTGGTACTTTATGTATTTTAGGTTGGTATTTGGCACATTTACACAACCTCCATGGCCTTGGGCACGTCGTC  
TTTTGTTGGTCTGGTGAAGCTTACCTTTCTTACAGTTTAGCTGCTATTTCTCTTATGGGTTTCACAGCTTGTGTT  
TCGGTTGGTTCAACAACACTGCATACCCTAGTGAGTTCTACGGCCCGACAGGTCTGAAGCGAGTCAAGCTCAA  
GCATTTACTTTCTAGTACGTGACCAACGTTTAGGTGCGAACGTTGCATCAGCACAAAGTCTACTGGTTTAGGT  
AAATACTTAATGCGTTCTCCAACAGGTGAAATATTTTCGGTGGTGAACCTATGCGTTTCTGGGACTTCAGAGG  
ACCTTGGGTAGAGCCTTTACGTGGCCCTTCAGGTTTAGACTTAGTTAAACTAAAAATGATATTCAACCTTGGC  
AGAAGCTGTCAGCTGAATATGACTCATGCTCCATTAGGTTTAACTTAACTCTGATGGTGGTGTGGCAACA  
GAAATTAACGCTGTTAACTTCGTTTCTCCTCGTTCTGGTTAGCTACATCACACTTCTGTTTAGGTTTCTTCTCT  
CGTAGGTCACCTATGGCATGCTGGTCGTGCTCGTGCAGGTTTCGAAAAAGGTATTGACCGTGTG  
ACGAACCTGTTCTTCAATGCGTCTTTAGACTAA

*psbD* ATGACTATTGCGATTGGTACATATCAAGAAAAACGTACTTGGTTTCGATGATGCAGATGACTGGCTTCGTC AAGA  
CCGATTTGTAATCGTAGGTTGGTCAGGTTTATTATTATTACCATTGTGCTTACTTTGCTGTAGGTGGTTGGTTAACT  
GGCTGTACTTTTCGTTACTTTCATGGTACACTCATGGATTAGCAAGTTTACATACATTGAAGGTTGTAACCTTCTAACT  
GCAGCTGTTTCTACACCAGTAAACAGTTTAGGTCACTCATTATTATTTCGTTTGGGCTGCTGAAGCACAAGTGAT  
TTAACTCGTTGGTTCCAACTTGGTGGTTTATGGGCATTCGTAGCATTACACGGTGTCTTTGGTTAATTGGTTTCA  
TGTTACGTCAGTTTGAATGTCACGTTTCAGTAACTTACGTCCATAACAACGCTATCGCGTCTCAGCACCAATTG  
CTGTATTGCTGTCTGTATTCTTAATTTACCCTTAGGTCATCAGGTTGGTCTTTGCTCCAAGCTTTGGTGTGTC  
ATCAATCTCCGTTTCATTTTATTCTTCCAAGTTTTTACATACTGGACTCTAAACCCATTCCACATGATGGGTGTA  
GCTGGTGTTTTAGGTGCAGCATTATTATGTGCTATTACGGTGTACTGTAGAAAACACTTTATTTCGAAGATGGT  
GACGGTGTAAACACTTTCCGTGCATTCAACCCAACCTCAAGCTGAAGAACTTACTCAATGGTAACTGCTAACCC  
TTTCTGGTCACAAATTTTCGGTGTAGCTTTCTCTAACAAACGTTGGTTACTTCTTCATGTTATTTCGTACCTGTA  
ACTGGTCTTTGGATGAGTGCTTTAGGTGAGTAGGTTTAGCTTTAAACTTACGTGCTTACGACTTCGTATCACAA  
GAGATCCGTGCTGCTGAAGATCCTGAGTTCGAAACATTCTACACTAAAAACCTTCTACTTAAACGAAGGTATTG  
TGCTTGATGGTGTCTCAAGACCAACCACATGAAAAATTAACATTACCTGAAGAAGTTTTACCTCGTGGTAAACG  
CTCTATAA

*psbE* ATGGCTGGAAAACCAGTAGAACGTCCTTTCTCAGATATTTTAAACAAGTATTTCGTTATTGGGTTATTACAGTATT  
ACTGTACCTTCATTATTTATTGCAGGTTGGCTTTTGTAGTACAGGATTAGCTTATGACGTATTTGGCAGTCCAC  
GTCCAAATGAATATTTTACAGAAGATCGTCAAGATGCTCCTTTAATTACTGACCGTTTTAATGCTTTAGAACAAG  
TTAAAAAATTATCAGCACATAA

*psbF* ATGACTACAAGAAAATCAGCTGAAGCTGTTACATATCCAATTTTTACTGTACGTTGGTTAGCTATTCACGCAATT  
GCAGTTCCTACTATTTCTTTTTAGGTGCAATTACAGCTATGCAATTTATAACAACGTTAA

*psbH* ATGGCTACAGGAAAAATAGTACACAACTTCAACATCACAGAACCAGGAATTGTTACGCCATTAGGAACTT  
TATTACGTCTCTAAACTCTGAAGCAGTAAAGTTTTACCTGGATGGGGTACTACAGTCTTATGGCTGTAGCAA  
TTCTTTTATTTGCTGTTTTTTTACTTATTATTCTAGAAATTTATAACAGTTCATTAATTTTAGATGGTGTACTAAT  
AGCTGGGAAAGTTTATCCGCTAAATAA

*psbI* ATGTTAACATTA AAAAATCTTTGTTTATACTGTGTAACTTTCTTCGTTGGATTATTCATTTTTGGATTCTTATCAA  
ATGATCCATCTCGTAATCCTGGTAAAGGTTTAGACTGTGCGACACGTTTCCTATAA

*psbJ* ATGTCAAACATTGGAACACTGGACGTATTCCTTTATGGCTGTGGGTACAGTTGTTGGTCTTTTAGCTATTGGT  
TTATTAGGAATCTTTTCTATGTTTCTACGTTGGTTTAGGTTCTTCTCAATAA

*psbK* ATGGCAAATTTAGTAATGGTTATTGCAAACTTCTGAAAGCTTATGCTCCTTTTCACCAATTGTTGATGTTTTAC  
CTATTATTCCAGTTTTATTTATTTATTAGCTTTTGTGGCAAGCTTCAAGTTAGTTTTAGATAA

*psbL* ATGGCTAGACCAAATCCAAATAAACAAGTAGTTGAATTAACCGTTCAAGTCTATATTGGGGACTTTTTATTAAT  
TTTTCGTTTTAGCTGTTTTATTCTGTGCGACCCGTTTTCCCTATAA

*psbM* ATGGAAGTAAATATTCTAGGATTAATTGCTACTGCTTTTATTATTATTTCAACTTCTTTTTTATTAATTCTTTA  
CGTTAAAAACAGCCGATCTGAACAATCTGAATCTTAA

*psbN* ATGGAAGTCCGGCTTTTTTCTTTACCTTCTTTTTATGGTTTCTTTTATTAAGTGCTACAGGTTATTAGTTTATGT  
TAGTTTTGGACCTCCTTCAAGAAAATTGAGAGATCCTTTTGAAGAACATGAAGATTAA

*psbT* ATGGAAGCTTAGTTTACACTTCTTATTAATTGGAACGTTAGGTATTATCTTTTCGCTATCTTTTTTAGAGAGC  
CTCCACGTATTGCAAAAATAG

*psbZ* ATGACATCAATCTTCAAATTCGCTTACTTGGTTAGTTTTAGTTTCTTTTGCATTAGTAGTAGGTGTACCAGTAG  
TGTTGCTCTCTCAATGGTTGGACTGAAAATAAAGGAGTAGTTTTCTCTGGTTAAGCGTATGGTTTTTATTAG  
TTTTTGCTGTAGGTGATTTAATTCTTTTGCAGTTTAA

*rpl2* ATGGGAATTCATTTATTAATCCGTGTACACCAGGTACACGTAATCGATCCGATCAGATTTTAGTGAATTGACT  
CGTACAAAACCAGAAAAGTCATTAACATCTTATAGACAAAGATCAAACGGACGTAATAACCGTGGTATTATTA  
CATGTGCTCATCGTGGAGGGGGTCACAAACGTTTATATCGTCAAATGATTTTAGACGTGATAAAATGGAGTA  
CCTGCCAAAGTTATATCGATGGAATATGATCCAATAGAAATGCAAGAATTGCTCTTTTACATTATGAAGATGG



AGTAAAACGTTATATTTTACATCCACGTGGTTTAAATCCAGGTGAAACGATTATTTCTGATTTAAATGCACCTAT  
 TTTAGTAGGTAATCTCTACCTTTACGTAATATTCCTTTAGGTGCCGAAATTCATAACGTTGAATTTCAACCCGG  
 TTCTGGAGGTCAATTAGCACGAGCTGCTGGCTCTTTAGTTGAAATTTAGCTAAAGAAGGTGATTTTGTAACAGT  
 TCGTTTACCATCAAAAAGAAATTCGTTTTATTTCAAAAAATAGTTGGGCTACTCTTGGTCAAGTTGGGAATGTAGA  
 AGCTTATAACTTAATCGGTAAAGCTGGTCTCTCGTGGTATAGGTATTCGACCAACTGTGCGTGGTTCAGC  
 CATGAATCCAGTAGATCACCCGCATGGTGGTGAAGGACGTGCACCTATTGGGCATAGTCGTCCATTAACAC  
 CTTGGGGACGCCCTGCTTAGGTAACCTAACGCGTAAACCAAAAAATTTAGTAATGTTTTTATTATCCGTAAA  
 CGTAAATAG  
*rpl5* ATGGCACAAACACAAAGATAGAAAAACAATACGTAGAAACAATTGTTCTTACACTTATGAAAAAATCCAAT  
 AAAAAATATTCACCAAGTACCTAAAATTGAAAAAATTGTAATTAATCGTGGTATTGGTAGTGCATCACAAAAC  
 CAAAAATGGTGGATTCCGCTTTAAAAGAATTAGGTATGATTGCTGGACAAAAGGTGTTATTACACGTTCTAA  
 AAAAGCAATTGCTAGTTTTAAATTAAGAGAACAATGCCAGTAGGTGTTGCTGTGACTTTACGCGGTAATCGTA  
 TGTATGGATTTTTAGACCGATTAAATCCATTTAGCATTACCGATTTCGCGATTTCAGGTTAATTAACCAAGAA  
 GTTTTGACAAAAAAGGTAATTATAGTTTAGGTCTAGAAGAACAATTAATGTTCCCTGAAATTGAATATGATAAA  
 ATTGATCAAATTCGTGGTATGGATATTTCTATTGTAACAACAGCAACAAAACAAGAAGAAGGATTAAGCCTTTT  
 ACAAGAATTTGGATTACCTTTTAAATAA  
*rpl14* ATGATCAAACCGCAATCTTTTTTAAATGTTGCTGACAATAGTGGTGCACGTAATAATGTTGATTTCGTGTTTTA  
 GGATCAGGTTTACGTAATATTGGTGACACTATTATTGCAGTCGTAAAAGATGCTATTCCATAATATGCCAACAAA  
 AAAATCTGATGTTGTACGAGGAGTTATTGTACGTACAAAAAAGGCATTTCGTAGACCAAAATGGTATGAATATTA  
 AATTTGATGATAACGCTGCTGTTATTGTTAATAAAGAAGAAATTTACGAGTACTCGTGTTTTTGGCCTATTG  
 CTCGTGAATTAAGAGATCGTAATTTTACTAAAATTATCTTTAGCACAGAGGTTGCTATAA  
*rpl16* ATGTTAAGTCCAAAAAGAACAATAATTCGTAACAACATCGTGGTAGATTAAGGAAAAAGCGTATCGTGGAA  
 ACACAATAGCTTTTGGTGATTTTGGCTTTACAAGCTTTAGAACCATGTTGGATTACTTCTCGTCAAATTGAATCAG  
 GAAGACGTGTTCTTACACGTTATGTACGTCGTGGTGGTAAATTATGGATTTCGATTTTTCCAGATAAACCTATTA  
 CTGCACGTCCAGCTGGTACACGTATGGGATCTGGTAAAGGTGCTCCTGAATATTGGGTAGCTGTTGTTAAACCA  
 GGTAATAATTTATGAAATTCGCGGTGTTAATGAAATTTGAGCGCGTCACGCTTTACGAATTGCTTCGTATAAAA  
 ATGCCAATCAAAACTAAATTTTTAGGCCGTACTTCTGTTTAA  
*rpl20* ATGACTCGTGTAAAACGTGGTAATGTTTCTAGAAAAACGCCATAAAAAAATATTAAGTTAAATAAGGGTTCCG  
 TGGTTCAGCATCGGCTCTTTATCGTACTGCTAAAACAACAAAATATGAAAGCTTTGCGTTATTCTTATGCTAATCG  
 TCGTCAAAAAAACGTGAATTTAGAAGTATTTGGATTACACGTTTAAATGCTGCGATTAGACGTTATGGATTGA  
 ATTATTCTGAATTTATTTATTTAAAAAATCGTTCAATCCAATTAATCGTAAAGTTTTAGCTCAATTATCAAT  
 TTGTGATCCTGAAGCGTTACACAATTGTTACTTTTTTAA  
*rpl23* ATGACTGAAACTACAGAAAATGTAACATAAAGATGCTAATATGTCGCCTCAATCAATTTCTTTTTAATATTGATTTA  
 GTCAAATCCTATTATTACAGAAAAAACCTATTTAGCCCTATATAAACATCGTCAATATACGTTTGATATTGAT  
 AAACGTTTAACTAAAACGCAAAATTAATAAATTTCTCTAATTTATTTAATGTGGATGTAATTGCAGTTAATACA  
 CACATACCTCCTCGACAACAACCTCGTGTGGTATGGCACAAGGTTTCCGTCCTCTTTTTAAAAGAGCTATTGTA  
 ACTTTAAAAGAAGGACAATCAATTAATTTCAATTTAAAACCAAATTCATAA  
*rpl36* ATGAAAGTACGTTCTTCAGTTAAAAAATCTGTGACAAATGTCGTGTTATTCGCCGAAAAGGTACTGTAATGGT  
 TATTTGTTCTAACCTAAACATAAACACGTCAGGTTAA  
*rps4* ATGGCTAGATATATTGGACCCAAATTAATAATTTCTGTCGAATTGGTAAATTACGTGGTTTTAACACGAAAAAA  
 ACCTTTTCTGTCGTGTTTATCGTGGAAAGAGGTCCTTTAAGAGGTAAGTAATTCCTCCAGGACAACATGGTCTTAT  
 TAAACTATTTAAAACAAGACCTTATGATTTCTGTGAATCAGATTACTAATTCGTTTAAAAGTAAAACAACGTTT  
 ACGTTATAACTATGGTTTAAACAGAACGTCAATTAGTAAATTATGTACGTAAAAGCCAAAAAATTAAGAAGCA  
 ACAGGTCAAGTTCTTTTACAATTATTAGAAATGCGTTTAGATAATATTGTTTTCTGTTTAAATATGGCTCCGACT  
 ATTGTAGCTGCACGTCAATACATTAGTCATGGACATATTCGTGTAATAATAAAAAAGTTAATATTCCAAGTTA  
 TATGTGTAACCTAAAGACGTAATATCAGTTGCTATGAAAGAAAAATCTCTTATTCTTATTAATAGAACTTAA  
 ATGAATATTATCAACGTATGCAGTTTTATAAAAAACGTTTAGAAAAAACACTTGCGTTTATTTTATTTTACGCTAA  
 AACTAGTACCTAATATGGGTCTGCTTTACAATTAATTAATGGTCCAGGAGCTGTTGTAATAATAATAATAGA  
 CGTGTACGTAATCCTAATCATATTTGTAATTTCTAAAGACGTTCTGTCTATTACAACACGTGAAGGAACACGTC  
 AATAAACTTTCTTAA  
*rps8* ATGATTACATCATTAACCTCGAGGTTTTATTTCATGACAGTATTAGTGACATGCTTACACGAATTAGAAATGCTTGT  
 TTAGCAAAAAAATCTAATGTTATTGTACCACACACTAAGCTGAATCTAGAAATAGCACATATTTTAGAAAAAGA  
 GGGTTTTATCCAAGGTTTCAAATGTCACTAGAAATCGAATGATATAATTATTTCGTTTAAAATATCGTTCAAAACA  
 AGTTTATCGTGGTAAAACAAAAGAATCTTGTATTACTAATCTTAAACGAATTAGTAAACCTGGCCTTCGTATTTA  
 TGCAAACTAAAGAAATTCACGTAATTTAGGTGGTACAGGTAATTGTAATTGATCAACTCTACTGGTATTAT  
 GACTGATCGAGAAGCTCGTTTTAAAAAATGGTGGGAGATAATTTGCTCAGTTTGGTAA  
*rps9* ATGGCGAGATTGGTAAAAAATCAATTTATGAATTTTTAGCGCGTAGTGTAAGAACGTAAGGAAGCTGTAG  
 CACAGGTGCAAATTGTTAAAGGTACAAATGAAGCACCGGGTGGTCAATTTATTATTAATAACATACCAGCAGA  
 AAATTTATTACACAATAACACATGTTCAATTTCTTTCAGTTAAAGCACCTATTAGTATTTTACAAAGCTTACATGA  
 TGCTAGTGTAGAAGGTGAAAATACTGATTTTTAAAAATGACTTAGGTAATTTAATACTGTTGTAAGGTTAAAG  
 GTGGTGGCTTAGTTGGTCAAGCAGAAGCTATTAATTAGGATTAACACGAGCTATTTGTCATTTATATGCTATTA  
 CACCGAATAATCAAAATAAATCTATTAGAGAATTTCCAATTGAAAATTCATGGAAGAATCTTCAAAAAATTC

TCAAGTGAATGAGCTATGAAACTACAATAGAACTACGTAAACAATTCAAAGATAAAGGATTTTTAACACAAG  
 ATTCACGTGTTAAAGAACGTAGAAAATATGGTTTAAAGAAAGCAGCAAAGCTTACAATACCACAAACGTTA  
 A  
*rps11* ATGGCTAGACAAAACAAGAAAACCTTACATCAGCTAAAACAAGAAAACGTGTTTATAGAGGAATTGTTACATAC  
 AAGCTGGGCATCATAATACTATTGTAACCTATTACTAACATTAGAGGAGAAGTTTTATGTTGGAGCTCATCTGGT  
 GCTTGTGGCTTTAAAGGAAAACGTAAATCAACTGGATTTGCAGCAAAAAAGCTGCAGAAAACAGCTGCTAAAA  
 GATCACGTGATTTTTTAATGCGAGAAGCTAAAGTCTTAGTAAATGGTCCGGGACAAGGACGTGAAAAGTCCATT  
 CGTGAAATTTTTAAAGCAGACATAAAAGTAAATGTAATTCGTGAAAAATCAGGAATTCCTCATAACGGATGCCG  
 CCCACAAAAGCTCGTAGTGATAA  
*rps12* ATGCCTACTATTCAACAATTAATACGTTTCAGCAGCAAAAAACAACCACAAAAAGTAAAGCACCGGCTTAA  
 AATCATGTCCACAACGACGAGGATTTGCTTACGTGTTTATACTGTAACGCCTAAAAAACCAACTCAGCGTTA  
 CGTAAAGTAGCTCGTATTTCGATTAACCTCAGGTTTCGAAGTTACAGCATATATTCCAGGTATTGGACATAATCTT  
 CAAGAGCATGCGGTGGTCTTGTTCGTGGTGAAGGGTAAAAGATTTACCAGGTATCGTTATCATATTGTACG  
 TGGTACTTTAGATACTGCTGGTGTAAAAAACCGTACTCAAAGTCGTAGTAAATATGGTGCTAAAAATGGCATCAA  
 AACAGCAGCTAAAAATAA  
*rps18* ATGGCAGCTCCAAATCTTCAAAAAAACTACAAAAAATGTCCGTGGTAAATTTAACACATCAAATACAAATCC  
 ATCTCGTGTTTATCTTTATCGCAATTATTAGGTAGTGTTCAAAAAACAACGTACTCAACGTGCTAAACGATCAAC  
 AGGTAGAACTCCTATTAACCATTAATTCACCAAAGTCTTTAATTATTATTTAAAAGAAAAACCTGAAAAAG  
 CTGTATATACTCGACGTATTATTGATTATAACATTGTGGCTTATTACAACGTTACATCGGTTTAGGTGGTAAAA  
 TTTTACTAGAAGACAAACACGTTTAAACAGCTAAACAACAACAGCTATATTGCTAAAAACAATTTAAAGTGCACGT  
 GTAATGGGTTTATTACCATTGTAAAGTAAAGAAAAAGGTTTTTTTAGATAA  
*rps19* ATGCCACGTTCAATTACAAAAGGTCCATTTGTAGCAGGACATTTATTAAAAAAAGTAGAAAAATTTAAATAGTAT  
 AGGTAAAAAATTGTTATGAAAACCTGGTCTCGTTCATCTGTGATTATTCCTCCAATGATAGGTACACAAATTGC  
 TTGTTATAATGGTAAAGAACATATTCCAATTTATATAACAGACCAATGGTGGGTCACAAACTAGGGGAATTTG  
 CCTAACACGTAATTATCGTGGTCACATTAAGAACGATAAAAAATCAAAACGATAA  
*tufA* ATGGCACGTGCTAAATTTGAACGTAAAAAACCATGTAAATATTGGTACTATTGGACATGTAGACCATGGTAA  
 AACTACATTAACAGCTGCTATTACAATGACATTAGCAGCTAAAGGTAGTGGATTAGCAAAAAAATATGATGAA  
 ATTGATTCTGCACCTGAAGAAAAAGCTCGTGGTATTACAATTAATACAGCACACGTAGAATATGAAACAGATA  
 ACCGCCATTATGCACACGTAGATTGTCCAGGTATGCTGATTATGTTAAAAACATGATTACAGGTGCTGCACAA  
 ATGGATGGTGTATTTTAGTTGTATCTGGTGCAGATGGTCCAATGCCACAAACAAAAGAACATATTTTACTTGTCT  
 AAACAAGTTGGTGTTCCTAATATTGTTGTATTCTTAAACAAGAAGATCAAGTAGATGATAAAGAATTATTAGA  
 ATTAGTAGAATTAGAGGTTTCGTGAAACTTTAGATAAATACGAATTCCTGGTGATGAAATTCCTATCGTTTCAG  
 GTTCTGCTTTATTAGCTTTAGAAGCACTTGTGAAAAACCTAAAATTTAAACGTGGTGAACCAATGGATTGAT  
 AAAATTTATGCTTAATGGATAAAGTAGATTCTTATTCCAACACCAGAACGTCAAACAGAAAAACCTTTCTT  
 ATTAGTTGTGAAGATGTTTTATCTATTACAGGTCGTGGTACAGTTGCTACAGGTCGTGTTGAACGTGGTACTTT  
 AAAACTTGGTGAACCGTAGAAGTAGTAGGTTAAAAGAAACAAAAAGTACAGTTGTTACTGGTTTAGAAATG  
 TTTAAAAAACATTAGACGAAACAATGGCTGGTGATAACGTAGGTGATTATTACGTGGTATCCAAAAAAG  
 ATATCGAACGTGGTATGGTTTTAGCTAAACCTGGTAGTATTACACCACATACAAAATTTGAATCTCAAGTTTATA  
 TTTTAAACAAAAGAAGAGGGTGGTCTGCTCACTCAGCTTTCTTAACTGGGTACACACCACAATTTATGTACGAACA  
 ACAGACGTAACCTGGTAAAGTAGCTGGTTTTTCACATATTCAAATGCGTAATCCTTCATCTGTTGCTGAAGAACAT  
 TCTAATAAAATGGCAATGCCTGGTGACCGTATTAGTATGGTTGTTGAATTAATTAACGCAATTTGCTATTGAAAA  
 AGGTATGCGTTTTGCTATTTCGTGAAGGTGGACGTACTGTAGGTGCAGGTGTTGTTACATCTATTATTGAATAA  
*yef3* ATGCCACGTACACAACGAAATGATAATTTTATTGATAAAACATTTACAGTAATTGCTGATATTATTTAAAAAGTT  
 TTACCTACTTCACAACGTGAAAAACAAGCTTTTTCTTATTATAGAAATGGTATGTCAGCTCAAGCCGAGGGTGA  
 GTATGCTGAAGCACTTCAAATTTATTATGAAGCTATGCGTTTAGAAACAGATGCATATGACAGAAGTTATATTC  
 TATATAACATAGGACTAATTCATACTAGTAATGGTGAACATGGAAGAGCACTTGAATATTATTATCAGTCTTTA  
 GAAAGAAATCCTTCTTACCTAGTGCTCTAAATAATATTGCGGTAATTTATCATTACCGAGGAGAACAAGCTGC  
 TTTCCGGTGGTCAATCAGAAATTCACAAATTTATTTGAAAAAGCTGCAGATTTTGGAAAGAAGCTATTTCGCT  
 AGCTCCAACAATTTATTGAAGCACAAAACCTGGTTACAAATGACAGGTCGCTGGACTGGTGGTGCATAA  
*yef4* ATGAAGGAGAAAAATATGACAAAAAATGAACAAAAAACATCGCTAGAAACGAGTGTCTTAACAGGTACGCAA  
 AATAAACTGCCAATAAAAAGCAGCGCGTAACCTTATAAGACGTTATATTATTATAGGAGAAAGACGTATAAGTA  
 ATTATTGGTGGGCTTTCATTGTATTATTAGGCTCTTCTGGATTTTTATTAAGTGGGATTTGTTCTTATAATTATAA  
 TGCAGGTGATTCTCAGGAATTCTATTTAATTTGCTTCCGTTCTTGATTTTTAAAGACATTGCTTTTTTCCCACAG  
 GGACTTTAATGCTTTTTTATGGAGGTTTAGGATTTCTTTAAGTTTCTATTGGTGGTTTCTTATCTTTTGGAAATGT  
 AGGAGGTGGTTTTAACGAATTTAATAAAAAAGAAGGCTTTATTAGAATTTTCAGATGGGGTTATCCAGGAAAAA  
 ATCGTCTGATCGATTTTACATATCCTTTAAAAGATTTAAGAAGCCATCAAAGTTGAATTTAAAACAAGGATTAGAT  
 CCTCAACGAACTTTTTTTAAAACCTAAAAGGAAAAAAGAAATTCCTATTACTGGAAATAGGTGACCTTTAAC  
 TTTAAAAGAAATTTGAAAAACAAGCCTCTGAATTAGCTAATTTTCTGGATGTAAGTATTCTTACATAA  
*yef12* ATGAGTCTAACTCTTATTCTACAGTTAGTAGCCTTATTTGCGGTTGTAGCAGCTGGGCCACTTGTGTTGTTTTAT  
 TATCTGTTTCGTGGTGGTAATCTTTAA

**Supplementary Table S2.** Synonymous substitution rates in plastid and mitochondrial genomes of various plastid-bearing lineages.

|                                 | Substitutions per synonymous site<br>(SD) |             | Substitution rate ratios<br>(pt : mt) |
|---------------------------------|-------------------------------------------|-------------|---------------------------------------|
|                                 | ptDNA                                     | mtDNA       |                                       |
| <b>ARCHAEPLASTIDA</b>           |                                           |             |                                       |
| <b>Glaucophytes<sup>a</sup></b> |                                           |             |                                       |
| <i>Cyanophora</i>               | 1.01 (1.22)                               | 5.29 (3.17) | 1 : 5.3                               |
| <b>Green algae<sup>b</sup></b>  |                                           |             |                                       |
| <i>Dunaliella</i>               | 0.09 (0.32)                               | 1.16 (0.52) | 1 : 12.9                              |
| <i>Chlamydomonas</i>            | 0.30 (0.11)                               | 0.29 (0.05) | 1 : 1.0                               |
| <i>Mesostigma</i>               | 0.11 (0.06)                               | 0.17 (0.11) | 1 : 1.5                               |
| <b>Seed plants<sup>c</sup></b>  |                                           |             |                                       |
| Angiosperms                     | 0.39 (0.01)                               | 0.13 (0.01) | 1 : 0.3                               |
| Gymnosperms                     | 0.61 (0.03)                               | 0.28 (0.02) | 1 : 0.5                               |
| <b>Red algae<sup>d</sup></b>    |                                           |             |                                       |
| <i>Porphyra</i>                 | 0.47 (0.22)                               | 1.76 (0.58) | 1 : 3.7                               |
| <b>HAPTOPHYTA<sup>e</sup></b>   |                                           |             |                                       |
| <i>Phaeocystis</i>              | 0.25 (0.16)                               | 2.41 (0.97) | 1 : 9.6                               |

SD: standard deviation. Synonymous-site substitution rates are based on averages among loci, not concatenations.

<sup>a</sup>Data from Smith, Jackson, et al. (2014).

<sup>b</sup>Data from present study, Popescu and Lee (2007) and Hua et al. (2012).

<sup>c</sup>Data from Drouin et al. (2008).

<sup>d</sup>Data from Smith et al. (2012).

<sup>e</sup>Data from Smith, Arrigo, et al. (2014).

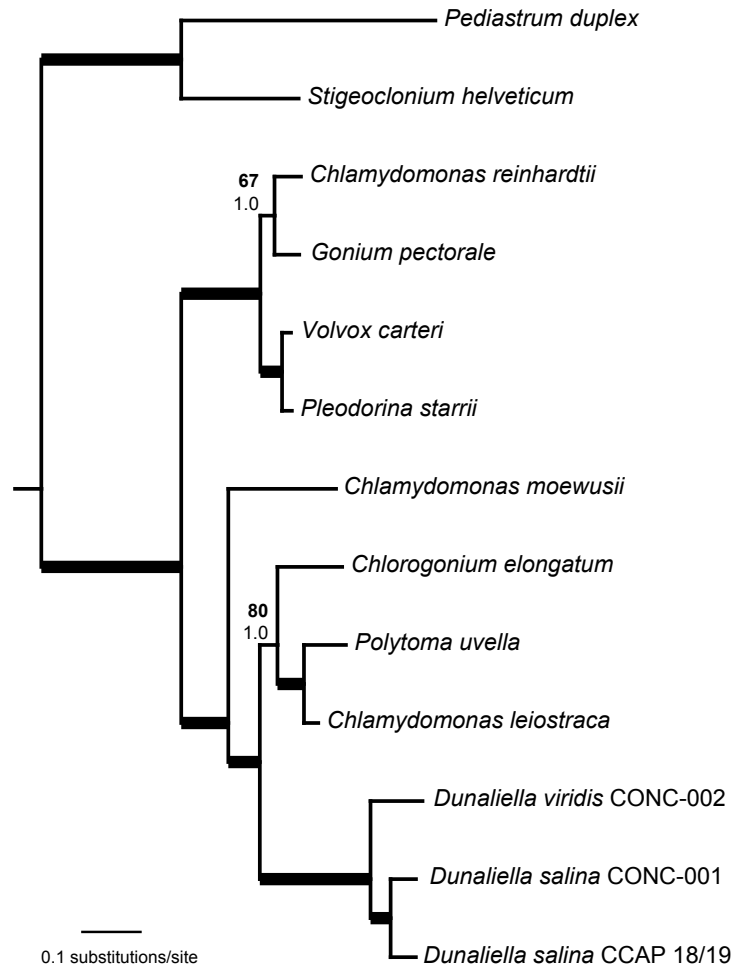

**Supplementary Figure S1.** Maximum-likelihood protein phylogeny of chlamydomonadalean algae. Conceptual protein translations of seven mitochondrial genes (*cob*, *cox1*, *nad1*, *nad2*, *nad4*, *nad5*, and *nad6*) were aligned with MAFFT v7 (Katoh and Standley 2013) and manually refined using Se-AL v2.0a11 (<http://tree.bio.ed.ac.uk/software/seal/>). Multiple alignments are available upon request. The best-fit amino acid substitution model for the seven-protein concatenated multiple alignment (1931 amino acids long) was selected with ProtTest3 using the AIC selection criterion (Darriba et al. 2011). Maximum likelihood trees were estimated with RAxML v7.2.6 (Stamatakis 2006) using the selected WAG+I substitution model. Branch support was assessed with 500 non-parametric bootstrap replicates. Bayesian posterior probabilities were calculated with MrBayes 3.2.1 (Ronquist et al., 2012) using the WAG+I+Γ substitution model running a Metropolis-coupled Markov Chains Monte Carlo (MC3) for 1.5 million generations. Two independent MC3 runs were performed simultaneously starting from different random trees. Trees were sampled every 100th generation. Final posterior probabilities were calculated after discarding trees sampled from the first 500,000 generations. **Note:** Branching order of Figure 1 from the main text is based on phylogenetic analyses of Nakada et al. (2008), González et al. (2009), Smith, Hua, et al. (2013), and Figueroa-Martinez et al. (2015).

## References

- Darriba D, Taboada GL, Doallo R, Posada D. 2011. ProtTest 3: fast selection of best-fit models of protein evolution. *Bioinformatics*. 27:1164–1165.
- Drouin G, Daoud H, Xia J. 2008. Relative rates of synonymous substitutions in the mitochondrial, chloroplast and nuclear genomes of seed plants. *Mol Phylogenet Evol*. 49:827–831.
- Figuroa-Martinez F, Nedelcu AM, Smith DR, Reyes-Prieto A. 2015. When the lights go out: the evolutionary fate of free-living colorless green algae. *New Phytol*. In press.
- González MA, Gómez PI, Polle JEW. 2009. Taxonomy and phylogeny of the genus *Dunaliella*. In: Ben-Amotz A, Polle JEW, Subba Rao DV, editors. *The Alga Dunaliella: Biodiversity, Physiology, Genomics and Biotechnology*. Enfield (NH): Science Publishers. p. 15-44.
- Hua J, Smith DR, Borza T, Lee RW. 2012. Similar relative mutation rates in the three genetic compartments of *Mesostigma* and *Chlamydomonas*. *Protist*. 163:105–115.
- Katoh K, Standley DM. 2013. MAFFT multiple sequence alignment software version 7: improvements in performance and usability. *Mol Biol Evol*. 30:772–780.
- Nakada T, Misawa K, Nozaki H. Molecular systematics of Volvocales (Chlorophyceae, Chlorophyta) based on exhaustive 18S rRNA phylogenetic analyses. 2008. *Mol Phylogenet Evol*. 48:281–291.
- Popescu CE, Lee RW. 2007. Mitochondrial genome sequence evolution in *Chlamydomonas*. *Genetics*. 175:819–826.
- Ronquist F, et al. 2012. MrBayes 3.2: efficient Bayesian phylogenetic inference and model choice across a large model space. *Syst Biol*. 61:539–542.
- Smith DR, Arrigo KR, Alderkamp AC, Allen AE. 2014. Massive difference in synonymous substitution rates among mitochondrial, plastid, and nuclear genes of *Phaeocystis* algae. *Mol Phylogenet Evol*. 71:36–40.
- Smith DR, Hua J, Archibald JM, Lee RW. 2013. Palindromic genes in the linear mitochondrial genome of the nonphotosynthetic green alga *Polytomella magna*. *Genome Biol Evol*. 5:1661–1667.
- Smith DR, Hua J, Lee RW, Keeling PJ. 2012. Relative rates of evolution among the three genetic compartments of the red alga *Porphyra* differ from those of green plants and do not correlate with genome architecture. *Mol Phylogenet Evol*. 65:339–344.
- Smith DR, Jackson CJ, Reyes-Prieto A. 2014. Nucleotide substitution analyses of the glaucophyte *Cyanophora* suggest an ancestrally lower mutation rate in plastid vs mitochondrial DNA for the Archaeplastida. *Mol Phylogenet Evol*. 79:380–384.
- Stamatakis A. 2006. RAxML-VI-HPC: maximum likelihood-based phylogenetic analyses with thousands of taxa and mixed models. *Bioinformatics*. 22:2688–2690.
